# Supplementary material
Source: Springer Nature journal article supplement (https://www.springermedizin.de/resource/supplementary/12967_2010_734_MOESM1_ESM.pdf/9577412)

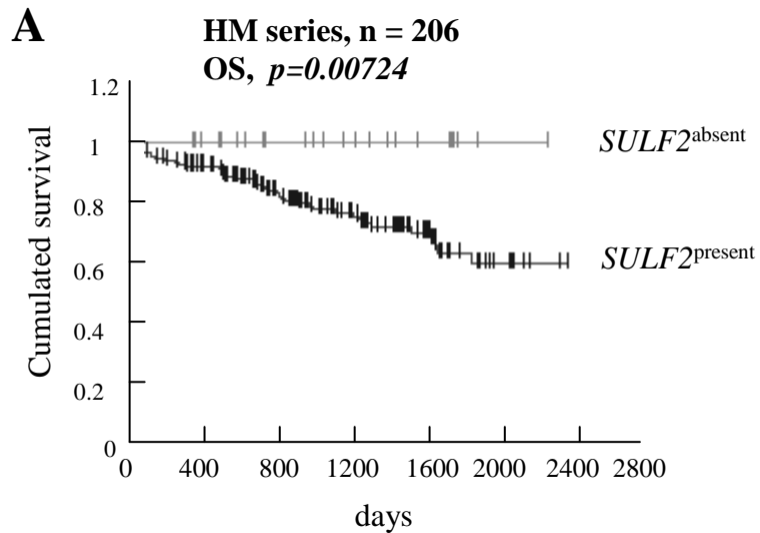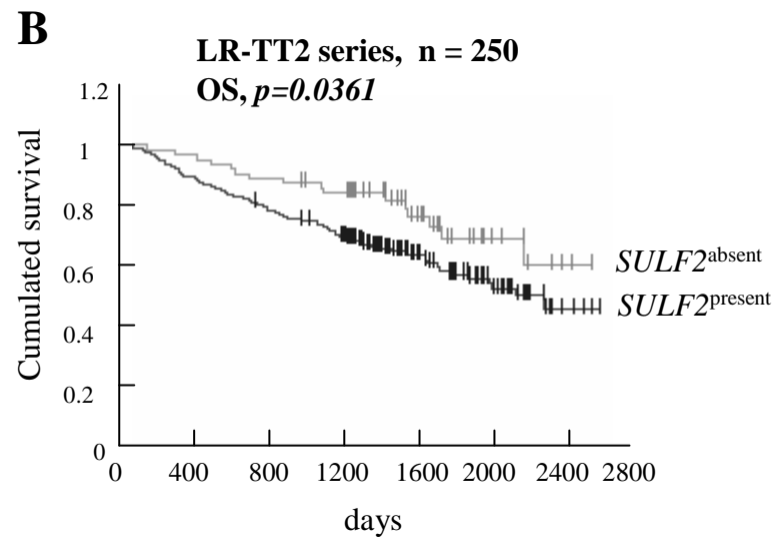

Supplement: MOESM1 [file 9577412]
